# Supplementary material for: Study on Thermal Decomposition Behaviors of Terpolymers of Carbon Dioxide, Propylene Oxide, and Cyclohexene Oxide
Source: PubMed Central journal article supplement (PMC6320886; doi:10.3390/ijms19123723), 2018-11-23
Supplement: ijms-19-03723-s001.pdf [file ijms-19-03723-s001.pdf]

1004A0117\_ppc

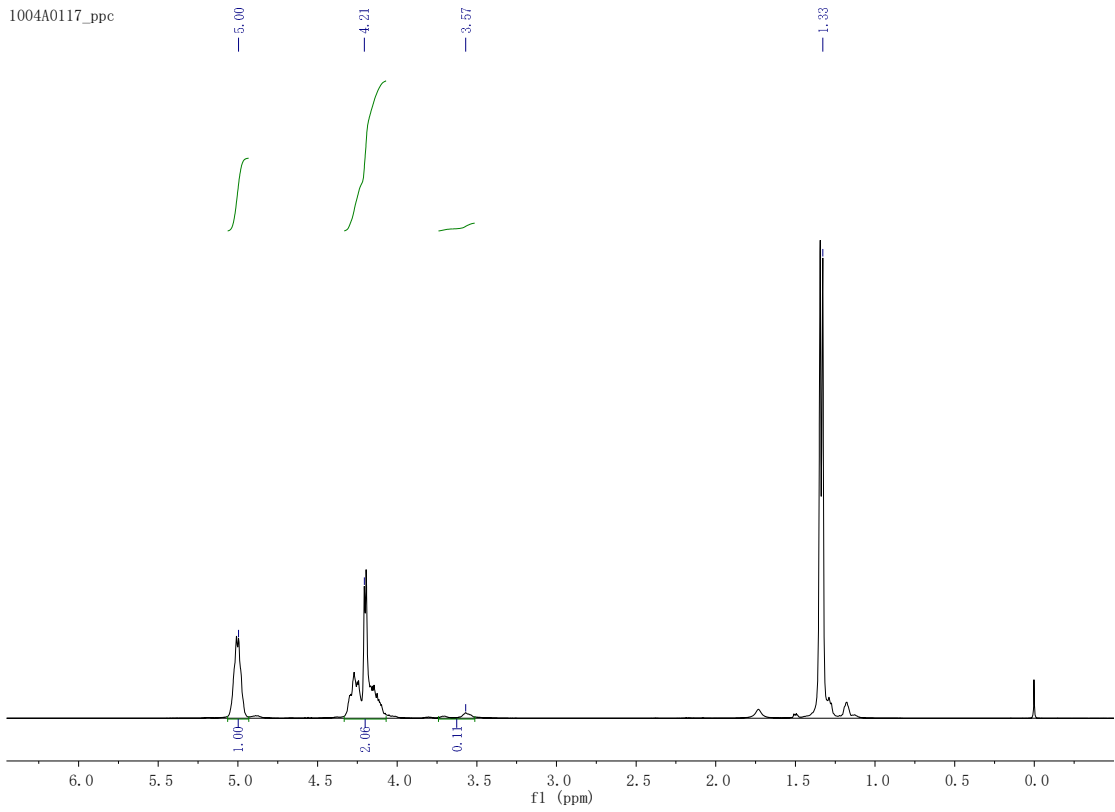

Figure S1. <sup>1</sup>H-NMR spectrum of PPC

1006A0426\_pp5

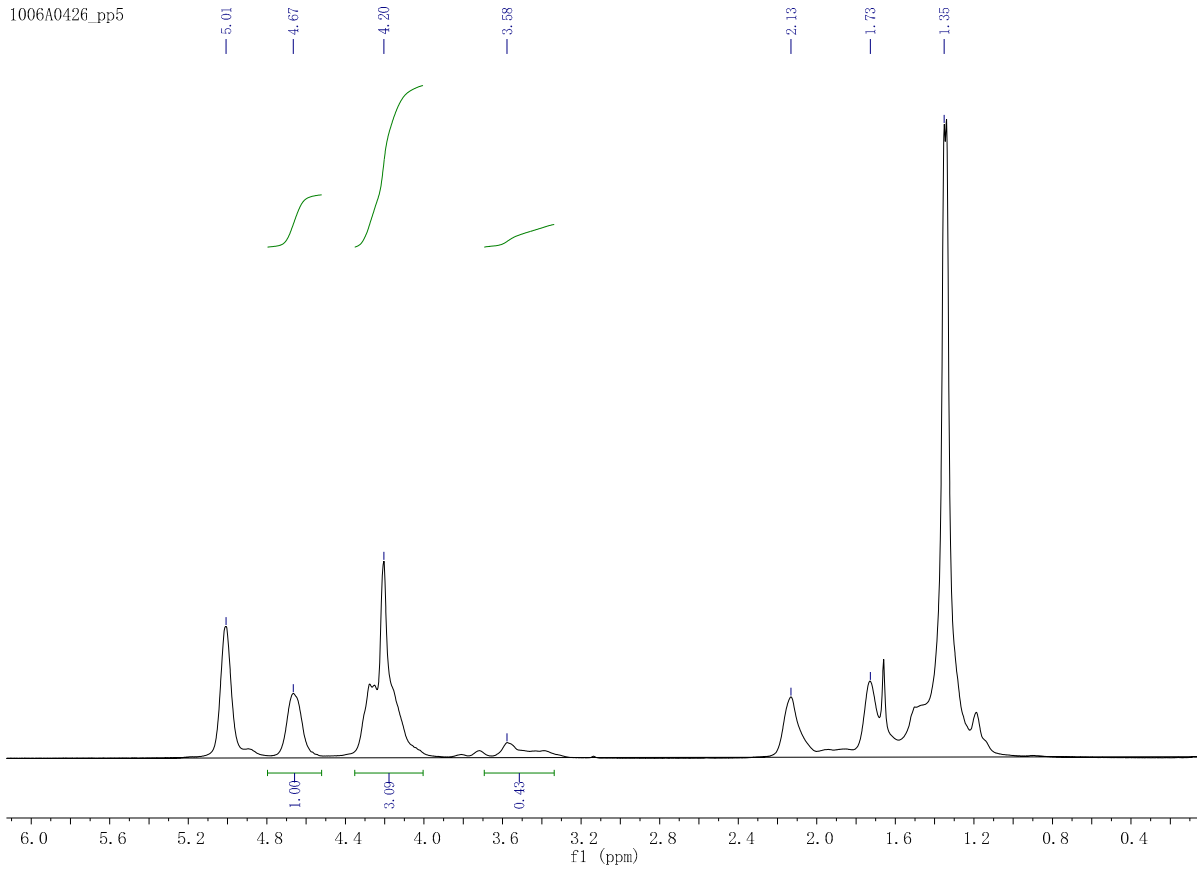

Figure S2. <sup>1</sup>H-NMR spectrum of PPCHC

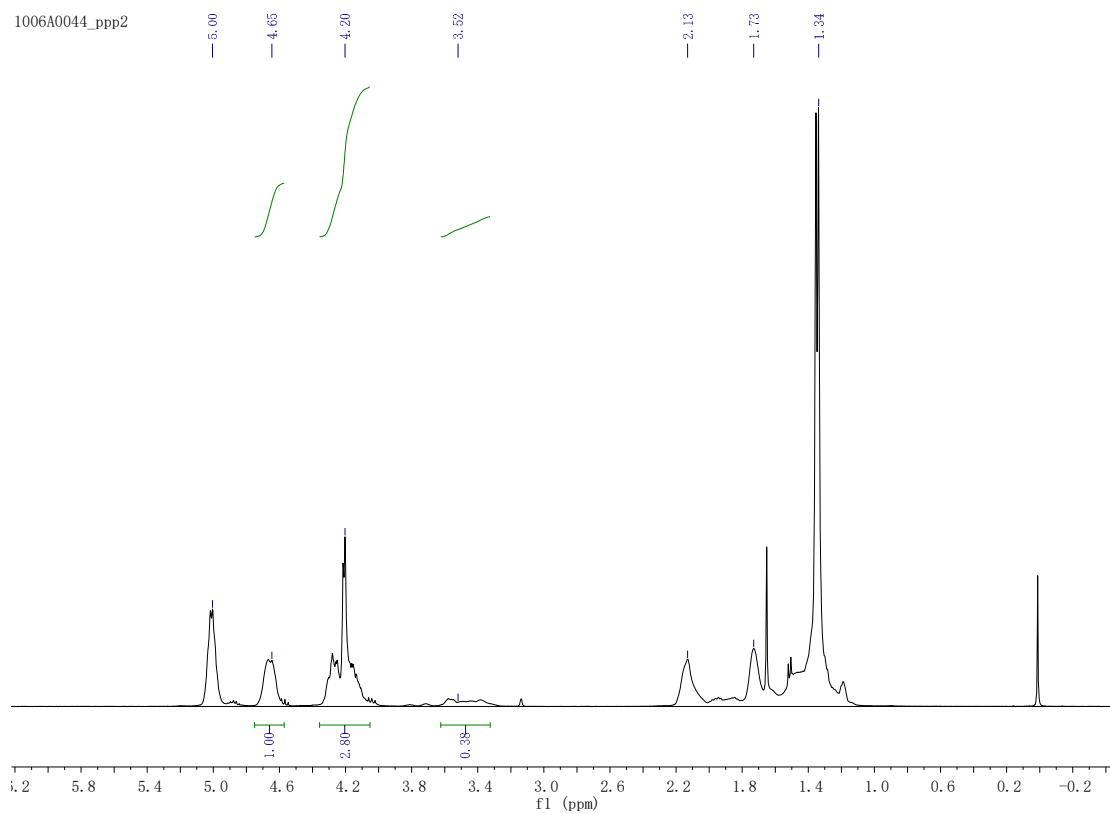

Figure S3.  $^1\text{H-NMR}$  spectrum of PPC-PCHC

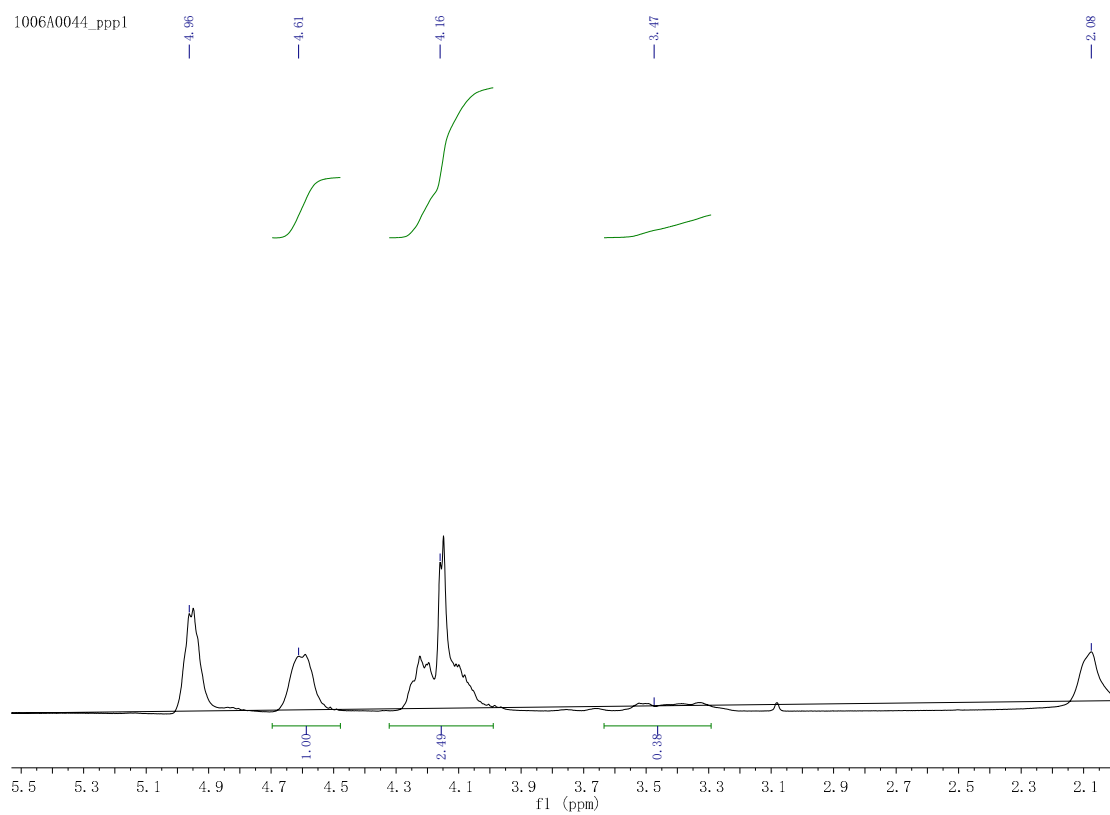

Figure S4.  $^1\text{H-NMR}$  spectrum of PCHC-PPC-PCHC

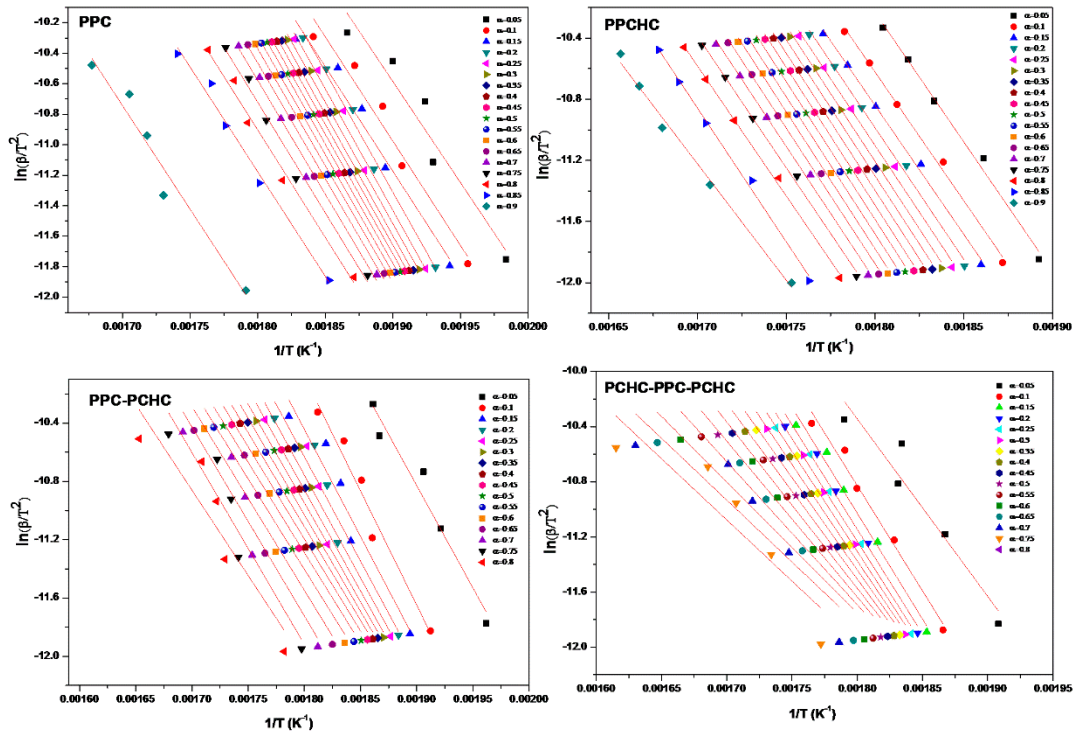

Figure.S5 Global kinetic plots of different polymers for KAS iso-conversional method

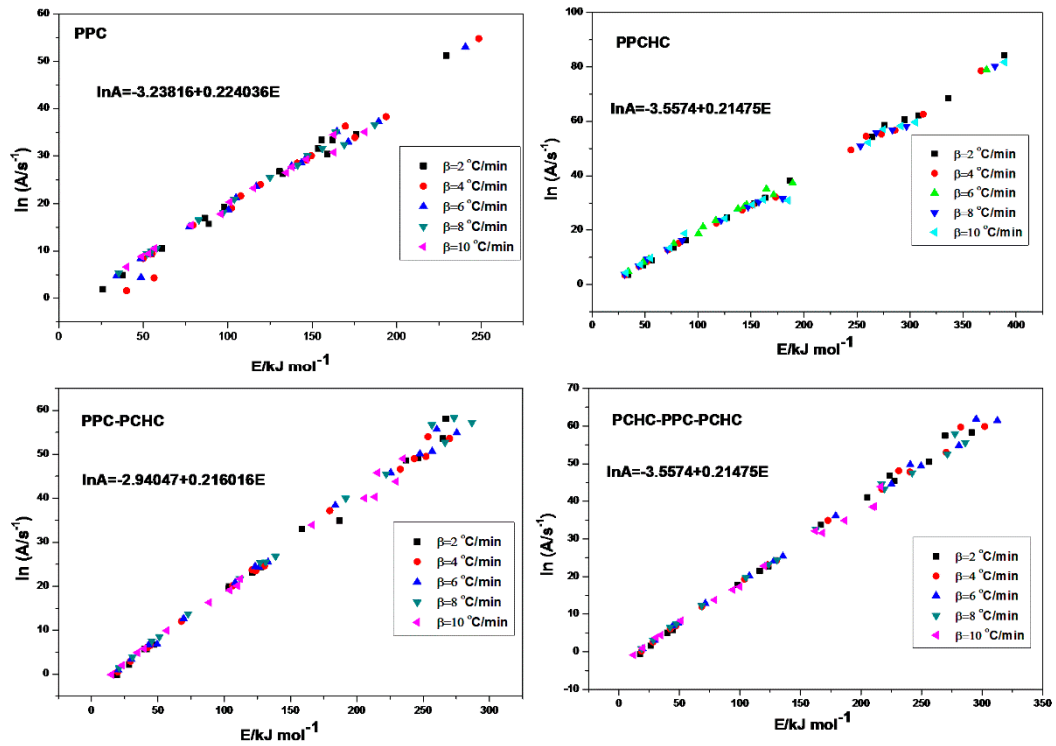

Figure.S6 Kinetics compensation effect of different polymers by fitting pairs of  $\ln A_i$  and  $E_i$  by 15 different models at each heating rate

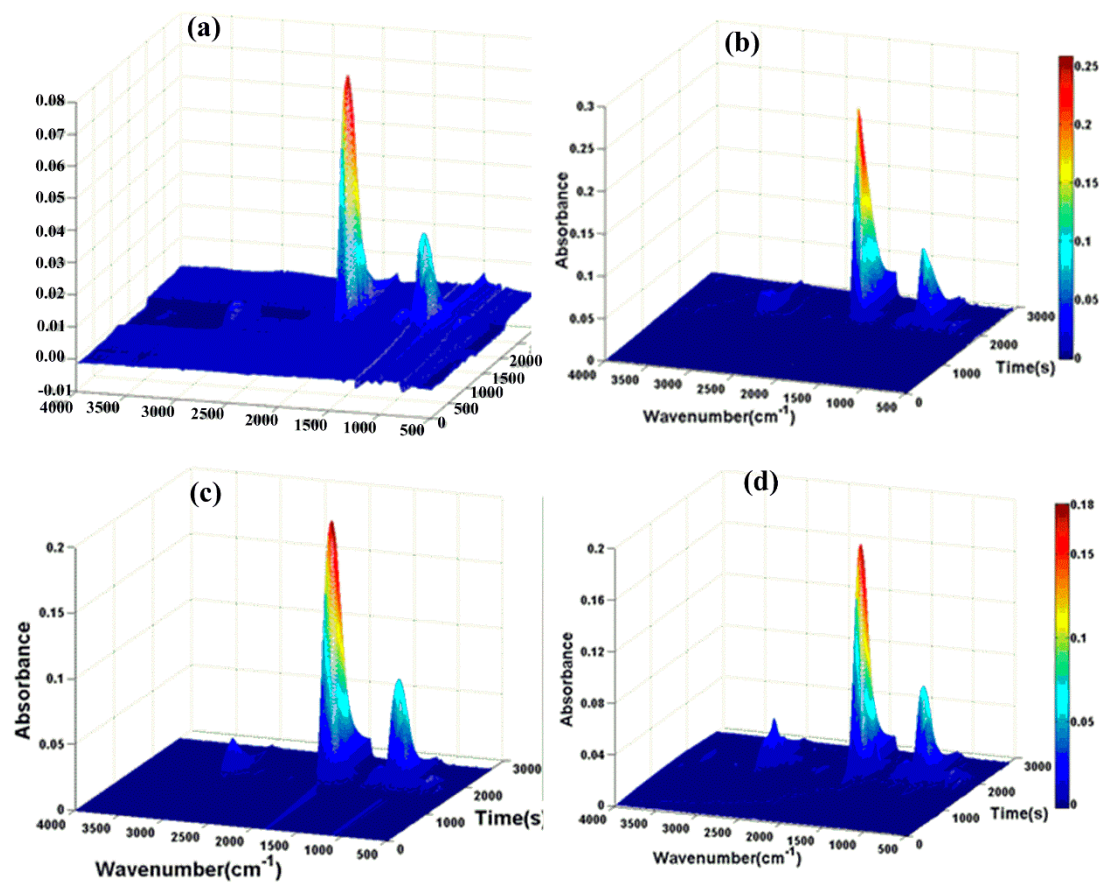

Figure.S7 Three-dimensional FTIR spectra  
 (a) PPC (b) PPCHC (c) PPC-PCHC (d) PCHC-PPC-PCHC

**Table A1** Kinetic parameter of PPC thermal decomposition by Coats-Redfern method

| Met<br>hod<br>No. | $\beta=2 \text{ K min}^{-1}$      |          |                | $\beta=2 \text{ K min}^{-1}$      |          |            | $\beta=2 \text{ K min}^{-1}$      |          |                | $\beta=2 \text{ K min}^{-1}$      |          |            | $\beta=2 \text{ K min}^{-1}$      |          |                |
|-------------------|-----------------------------------|----------|----------------|-----------------------------------|----------|------------|-----------------------------------|----------|----------------|-----------------------------------|----------|------------|-----------------------------------|----------|----------------|
|                   | E<br>/kJ<br>mo<br>l <sup>-1</sup> | ln<br>A  | R <sup>2</sup> | E<br>/kJ<br>mo<br>l <sup>-1</sup> | ln<br>A  |            | E<br>/kJ<br>mo<br>l <sup>-1</sup> | ln<br>A  | R <sup>2</sup> | E<br>/kJ<br>mo<br>l <sup>-1</sup> | ln<br>A  |            | E<br>/kJ<br>mo<br>l <sup>-1</sup> | ln<br>A  | R <sup>2</sup> |
| F1                | 97.<br>9                          | 19<br>.3 | 0.5<br>717     | 10<br>7.7                         | 21<br>.6 | 0.6<br>332 | 10<br>4.9                         | 21<br>.2 | 0.6<br>587     | 10<br>3.8                         | 20<br>.9 | 0.6<br>189 | 10<br>1.1                         | 20<br>.3 | 0.5<br>554     |
| F2                | 15<br>5.5                         | 33<br>.4 | 0.7<br>283     | 16<br>9.6                         | 36<br>.3 | 0.7<br>877 | 16<br>4.6                         | 35<br>.2 | 0.8<br>106     | 16<br>3.9                         | 35<br>.0 | 0.7<br>747 | 16<br>2.7                         | 34<br>.5 | 0.7<br>283     |
| F3                | 22<br>9.3                         | 51<br>.2 | 0.8<br>142     | 24<br>8.6                         | 54<br>.8 | 0.8<br>686 | 24<br>0.7                         | 53<br>.0 | 0.8<br>878     | 16<br>3.9                         | 35<br>.0 | 0.7<br>747 | 16<br>2.7                         | 34<br>.5 | 0.7<br>283     |
| D1                | 13<br>2.6                         | 26<br>.2 | 0.4<br>411     | 14<br>6.6                         | 29<br>.2 | 0.4<br>938 | 14<br>3.6                         | 28<br>.6 | 0.5<br>192     | 14<br>1.3                         | 28<br>.1 | 0.4<br>822 | 13<br>4.6                         | 26<br>.5 | 0.4<br>108     |
| D2                | 88.<br>7                          | 15<br>.7 | 0.4<br>062     | 10<br>2.1                         | 19<br>.0 | 0.4<br>945 | 10<br>0.4                         | 18<br>.7 | 0.5<br>153     | 97.<br>3                          | 18<br>.1 | 0.4<br>725 | 95.<br>8                          | 17<br>.8 | 0.4<br>785     |
| D3                | 17<br>6.1                         | 34<br>.6 | 0.5<br>406     | 19<br>3.8                         | 38<br>.3 | 0.5<br>979 | 18<br>9.3                         | 37<br>.3 | 0.6<br>237     | 18<br>7.0                         | 36<br>.6 | 0.5<br>854 | 18<br>1.1                         | 35<br>.1 | 0.5<br>197     |
| D4                | 15<br>8.9                         | 30<br>.4 | 0.5<br>026     | 17<br>5.2                         | 33<br>.9 | 0.5<br>586 | 17<br>1.3                         | 33<br>.0 | 0.5<br>844     | 16<br>9.0                         | 32<br>.4 | 0.5<br>463 | 16<br>2.7                         | 30<br>.8 | 0.4<br>782     |
| A2                | 86.<br>4                          | 16<br>.9 | 0.7<br>924     | 79.<br>4                          | 15<br>.4 | 0.7<br>635 | 77.<br>2                          | 15<br>.1 | 0.8<br>068     | 82.<br>8                          | 16<br>.5 | 0.8<br>003 | 78.<br>2                          | 15<br>.4 | 0.6<br>714     |
| A3                | 54.<br>7                          | 9.<br>3  | 0.7<br>737     | 49.<br>9                          | 8.<br>4  | 0.7<br>403 | 48.<br>5                          | 8.<br>4  | 0.7<br>860     | 52.<br>1                          | 9.<br>4  | 0.7<br>803 | 49.<br>0                          | 8.<br>8  | 0.6<br>420     |
| R1                | 13<br>0.6                         | 26<br>.8 | 0.7<br>109     | 11<br>9.4                         | 24<br>.0 | 0.6<br>724 | 11<br>6.8                         | 23<br>.6 | 0.7<br>150     | 12<br>5.0                         | 25<br>.5 | 0.7<br>110 | 11<br>5.4                         | 23<br>.2 | 0.5<br>667     |
| R2                | 15<br>3.5                         | 31<br>.6 | 0.7<br>612     | 14<br>1.1                         | 28<br>.5 | 0.7<br>292 | 13<br>7.8                         | 27<br>.9 | 0.7<br>715     | 14<br>7.3                         | 30<br>.0 | 0.7<br>658 | 13<br>7.9                         | 27<br>.7 | 0.6<br>321     |
| R3                | 16<br>2.2                         | 33<br>.4 | 0.7<br>776     | 14<br>9.5                         | 30<br>.1 | 0.7<br>479 | 14<br>5.9                         | 29<br>.4 | 0.7<br>899     | 15<br>5.9                         | 31<br>.6 | 0.7<br>837 | 14<br>6.6                         | 29<br>.3 | 0.6<br>543     |
| P2                | 60.<br>9                          | 10<br>.5 | 0.6<br>797     | 55.<br>2                          | 9.<br>4  | 0.6<br>345 | 53.<br>8                          | 9.<br>4  | 0.6<br>787     | 57.<br>9                          | 10<br>.5 | 0.6<br>766 | 53.<br>0                          | 9.<br>4  | 0.5<br>218     |
| P3                | 37.<br>7                          | 4.<br>9  | 0.9<br>118     | 56.<br>4                          | 4.<br>3  | 0.5<br>912 | 48.<br>6                          | 4.<br>4  | 0.6<br>365     | 35.<br>5                          | 5.<br>3  | 0.6<br>370 | 56.<br>6                          | 10<br>.5 | 0.7<br>427     |
| P4                | 26.<br>0                          | 1.<br>9  | 0.9<br>031     | 40.<br>1                          | 1.<br>6  | 0.5<br>419 | 34.<br>2                          | 4.<br>8  | 0.8<br>387     | 54.<br>7                          | 9.<br>9  | 0.8<br>885 | 40.<br>1                          | 6.<br>6  | 0.7<br>199     |

**Table A2** Kinetic parameter of PPCHC thermal decomposition by Coats-Redfern method

| Met<br>hod<br>No. | $\beta=2 \text{ K min}^{-1}$      |          |                | $\beta=2 \text{ K min}^{-1}$      |          |            | $\beta=2 \text{ K min}^{-1}$      |          |                | $\beta=2 \text{ K min}^{-1}$      |          |            | $\beta=2 \text{ K min}^{-1}$      |          |                |
|-------------------|-----------------------------------|----------|----------------|-----------------------------------|----------|------------|-----------------------------------|----------|----------------|-----------------------------------|----------|------------|-----------------------------------|----------|----------------|
|                   | E<br>/kJ<br>mo<br>l <sup>-1</sup> | ln<br>A  | R <sup>2</sup> | E<br>/kJ<br>mo<br>l <sup>-1</sup> | ln<br>A  |            | E<br>/kJ<br>mo<br>l <sup>-1</sup> | ln<br>A  | R <sup>2</sup> | E<br>/kJ<br>mo<br>l <sup>-1</sup> | ln<br>A  |            | E<br>/kJ<br>mo<br>l <sup>-1</sup> | ln<br>A  | R <sup>2</sup> |
| F1                | 18<br>6.4                         | 38<br>.2 | 0.8<br>960     | 17<br>3.3                         | 22<br>.1 | 0.6<br>332 | 10<br>4.9                         | 21<br>.2 | 0.65<br>87     | 17<br>9.9                         | 21<br>.5 | 0.6<br>189 | 18<br>4.8                         | 20<br>.9 | 0.5<br>554     |
| F2                | 27<br>5.9                         | 58<br>.7 | 0.8<br>682     | 25<br>8.7                         | 54<br>.5 | 0.9<br>612 | 16<br>4.6                         | 35<br>.2 | 0.81<br>06     | 26<br>8.2                         | 55<br>.9 | 0.9<br>670 | 27<br>5.0                         | 57<br>.1 | 0.9<br>696     |
| F3                | 38<br>8.9                         | 84<br>.3 | 0.9<br>916     | 36<br>6.9                         | 78<br>.6 | 0.9<br>896 | 37<br>2.1                         | 79<br>.0 | 0.99<br>118    | 38<br>0.1                         | 80<br>.3 | 0.9<br>942 | 38<br>9.2                         | 81<br>.8 | 0.9<br>945     |
| D1                | 26<br>4.4                         | 54<br>.3 | 0.7<br>795     | 24<br>4.2                         | 49<br>.5 | 0.7<br>426 | 14<br>3.6                         | 28<br>.6 | 0.51<br>92     | 25<br>3.3                         | 50<br>.9 | 0.7<br>479 | 26<br>0.6                         | 52<br>.2 | 0.7<br>561     |
| D2                | 29<br>4.9                         | 60<br>.6 | 0.8<br>167     | 27<br>3.1                         | 55<br>.3 | 0.7<br>823 | 10<br>0.4                         | 18<br>.7 | 0.51<br>53     | 28<br>3.3                         | 56<br>.8 | 0.7<br>884 | 29<br>1.4                         | 58<br>.3 | 0.7<br>958     |
| D3                | 33<br>6.2                         | 68<br>.5 | 0.8<br>624     | 31<br>2.4                         | 62<br>.6 | 0.8<br>320 | 18<br>9.3                         | 37<br>.3 | 0.62<br>37     | 28<br>3.3                         | 56<br>.8 | 0.7<br>884 | 29<br>1.4                         | 58<br>.3 | 0.7<br>958     |
| D4                | 30<br>8.4                         | 62<br>.2 | 0.8<br>330     | 28<br>5.9                         | 56<br>.7 | 0.7<br>999 | 17<br>1.3                         | 33<br>.0 | 0.58<br>44     | 29<br>6.6                         | 58<br>.2 | 0.8<br>062 | 30<br>4.9                         | 59<br>.7 | 0.8<br>133     |
| A2                | 88.<br>6                          | 16<br>.4 | 0.8<br>856     | 81.<br>9                          | 15<br>.2 | 0.8<br>541 | 77.<br>2                          | 15<br>.1 | 0.80<br>68     | 85.<br>1                          | 16<br>.2 | 0.8<br>621 | 87.<br>5                          | 16<br>.8 | 0.8<br>686     |
| A3                | 56.<br>0                          | 8.<br>9  | 0.8<br>737     | 51.<br>5                          | 8.<br>3  | 0.8<br>379 | 48.<br>5                          | 8.<br>4  | 0.78<br>60     | 52.<br>1                          | 9.<br>4  | 0.7<br>803 | 55.<br>1                          | 9.<br>7  | 0.8<br>543     |
| R1                | 12<br>7.6                         | 24<br>.6 | 0.7<br>665     | 11<br>7.4                         | 22<br>.5 | 0.7<br>265 | 11<br>6.8                         | 23<br>.6 | 0.71<br>50     | 12<br>1.8                         | 23<br>.6 | 0.7<br>323 | 12<br>5.5                         | 24<br>.3 | 0.7<br>411     |
| R2                | 15<br>3.3                         | 29<br>.9 | 0.8<br>335     | 14<br>1.8                         | 27<br>.4 | 0.7<br>988 | 13<br>7.8                         | 27<br>.9 | 0.77<br>15     | 14<br>7.2                         | 28<br>.5 | 0.8<br>056 | 15<br>1.4                         | 29<br>.4 | 0.8<br>130     |
| R3                | 16<br>3.5                         | 31<br>.9 | 0.8<br>553     | 15<br>1.5                         | 29<br>.2 | 0.8<br>228 | 14<br>5.9                         | 29<br>.4 | 0.78<br>99     | 15<br>7.2                         | 30<br>.4 | 0.8<br>298 | 16<br>1.6                         | 31<br>.3 | 0.8<br>367     |
| P2                | 77.<br>1                          | 13<br>.6 | 0.8<br>706     | 71.<br>6                          | 12<br>.7 | 0.8<br>262 | 53.<br>8                          | 9.<br>4  | 0.67<br>87     | 71.<br>0                          | 12<br>.9 | 0.7<br>996 | 73.<br>5                          | 13<br>.5 | 0.8<br>153     |
| P3                | 48.<br>3                          | 7.<br>0  | 0.8<br>556     | 44.<br>6                          | 6.<br>6  | 0.8<br>051 | 48.<br>6                          | 8.<br>3  | 0.85<br>58     | 44.<br>1                          | 6.<br>9  | 0.7<br>753 | 45.<br>8                          | 7.<br>4  | 0.7<br>931     |
| P4                | 34.<br>0                          | 3.<br>6  | 0.8<br>380     | 31.<br>1                          | 3.<br>4  | 0.7<br>803 | 34.<br>2                          | 4.<br>8  | 0.83<br>87     | 30.<br>7                          | 3.<br>8  | 0.7<br>470 | 32.<br>0                          | 4.<br>3  | 0.7<br>672     |

**Table A3** Kinetic parameter of PPC-PCHC thermal decomposition by Coats-Redfern method

| Met<br>hod<br>No. | $\beta=2 \text{ K min}^{-1}$      |              |                | $\beta=2 \text{ K min}^{-1}$      |          |            | $\beta=2 \text{ K min}^{-1}$      |          |                | $\beta=2 \text{ K min}^{-1}$      |          |            | $\beta=2 \text{ K min}^{-1}$      |              |                |
|-------------------|-----------------------------------|--------------|----------------|-----------------------------------|----------|------------|-----------------------------------|----------|----------------|-----------------------------------|----------|------------|-----------------------------------|--------------|----------------|
|                   | E<br>/kJ<br>mo<br>l <sup>-1</sup> | ln<br>A      | R <sup>2</sup> | E<br>/kJ<br>mo<br>l <sup>-1</sup> | ln<br>A  |            | E<br>/kJ<br>mo<br>l <sup>-1</sup> | ln<br>A  | R <sup>2</sup> | E<br>/kJ<br>mo<br>l <sup>-1</sup> | ln<br>A  |            | E<br>/kJ<br>mo<br>l <sup>-1</sup> | ln<br>A      | R <sup>2</sup> |
| F1                | 10<br>3.6                         | 19<br>.9     | 0.7<br>771     | 12<br>1.1                         | 23<br>.7 | 0.8<br>923 | 12<br>3.4                         | 24<br>.5 | 0.8<br>807     | 12<br>7.1                         | 25<br>.4 | 0.8<br>515 | 11<br>2.0                         | 21<br>.7     | 0.9<br>123     |
| F2                | 15<br>8.6                         | 33<br>.0     | 0.8<br>998     | 17<br>9.6                         | 37<br>.2 | 0.9<br>620 | 18<br>3.8                         | 38<br>.4 | 0.9<br>602     | 19<br>1.6                         | 40<br>.0 | 0.9<br>546 | 16<br>6.3                         | 33<br>.9     | 0.9<br>795     |
| F3                | 26<br>7.0                         | 58<br>.1     | 0.9<br>774     | 25<br>3.6                         | 54<br>.0 | 0.9<br>723 | 26<br>0.3                         | 55<br>.7 | 0.9<br>774     | 27<br>3.3                         | 58<br>.3 | 0.9<br>885 | 23<br>4.8                         | 49<br>.0     | 0.9<br>861     |
| D1                | 18<br>7.0                         | 34<br>.9     | 0.8<br>289     | 23<br>2.8                         | 46<br>.6 | 0.8<br>316 | 22<br>5.6                         | 45<br>.8 | 0.8<br>825     | 22<br>2.1                         | 45<br>.5 | 0.9<br>053 | 21<br>5.5                         | 45<br>.8     | 0.8<br>289     |
| D2                | 23<br>7.2                         | 48<br>.6     | 0.8<br>568     | 24<br>3.3                         | 49<br>.0 | 0.9<br>249 | 24<br>7.5                         | 50<br>.1 | 0.9<br>052     | 25<br>6.5                         | 56<br>.7 | 0.8<br>619 | 20<br>5.7                         | 40<br>.0     | 0.8<br>821     |
| D3                | 26<br>4.8                         | 53<br>.6     | 0.8<br>884     | 27<br>0.0                         | 53<br>.6 | 0.9<br>456 | 27<br>5.3                         | 54<br>.9 | 0.9<br>298     | 28<br>6.7                         | 57<br>.2 | 0.8<br>959 | 22<br>9.5                         | 43<br>.8     | 0.9<br>117     |
| D4                | 24<br>6.3                         | 49<br>.2     | 0.8<br>682     | 25<br>2.1                         | 49<br>.5 | 0.9<br>326 | 25<br>6.7                         | 50<br>.7 | 0.9<br>142     | 26<br>6.5                         | 52<br>.7 | 0.8<br>742 | 21<br>3.5                         | 40<br>.3     | 0.8<br>929     |
| A2                | 0.0                               | 5.<br>7      | 0.8<br>968     | 67.<br>7                          | 12<br>.0 | 0.9<br>520 | 69.<br>3                          | 12<br>.7 | 0.9<br>377     | 72.<br>8                          | 13<br>.7 | 0.9<br>086 | 56.<br>6                          | 9.<br>9      | 0.9<br>176     |
| A3                | 41.<br>6                          | 5.<br>7      | 0.8<br>824     | 42.<br>1                          | 6.<br>1  | 0.9<br>447 | 43.<br>1                          | 6.<br>7  | 0.9<br>286     | 45.<br>4                          | 7.<br>5  | 0.8<br>962 | 34.<br>5                          | 4.<br>9      | 0.9<br>020     |
| R1                | 10<br>3.2                         | 19<br>.5     | 0.8<br>157     | 10<br>6.4                         | 20<br>.1 | 0.8<br>974 | 10<br>8.2                         | 20<br>.8 | 0.8<br>730     | 11<br>1.7                         | 21<br>.7 | 0.8<br>191 | 88.<br>7                          | 16<br>.3     | 0.8<br>409     |
| R2                | 12<br>1.1                         | 23<br>.1     | 0.8<br>655     | 12<br>3.8                         | 23<br>.5 | 0.9<br>319 | 12<br>6.2                         | 24<br>.3 | 0.9<br>131     | 13<br>1.2                         | 25<br>.5 | 0.8<br>726 | 10<br>4.1                         | 19<br>.1     | 0.8<br>894     |
| R3                | 12<br>7.9                         | 24<br>.3     | 0.8<br>809     | 13<br>0.4                         | 24<br>.6 | 0.9<br>417 | 13<br>3.0                         | 25<br>.5 | 0.9<br>249     | 13<br>8.7                         | 26<br>.8 | 0.8<br>891 | 10<br>9.9                         | 20<br>.1     | 0.9<br>040     |
| P2                | 47.<br>1                          | 6.<br>7      | 0.7<br>850     | 29.<br>3                          | 2.<br>9  | 0.8<br>541 | 29.<br>9                          | 3.<br>4  | 0.8<br>221     | 51.<br>1                          | 8.<br>5  | 0.7<br>900 | 39.<br>5                          | 5.<br>8      | 0.8<br>055     |
| P3                | 28.<br>4                          | 2.<br>2      | 0.7<br>471     | 44.<br>6                          | 6.<br>6  | 0.8<br>051 | 49.<br>4                          | 6.<br>8  | 0.7<br>795     | 30.<br>9                          | 3.<br>9  | 0.7<br>544 | 23.<br>1                          | 2.<br>0      | 0.7<br>586     |
| P4                | 19.<br>0                          | -<br>0.<br>2 | 0.7<br>001     | 19.<br>7                          | 0.<br>5  | 0.8<br>226 | 20.<br>1                          | 1.<br>0  | 0.7<br>859     | 20.<br>8                          | 1.<br>4  | 0.7<br>104 | 14.<br>9                          | -<br>0.<br>1 | 0.6<br>959     |

**Table A4** Kinetic parameter of PCHC-PPC-PCHC thermal decomposition by Coats-Redfern method

| Met<br>hod<br>No. | $\beta=2 \text{ K min}^{-1}$      |              |                | $\beta=2 \text{ K min}^{-1}$      |          |            | $\beta=2 \text{ K min}^{-1}$      |          |                | $\beta=2 \text{ K min}^{-1}$      |          |            | $\beta=2 \text{ K min}^{-1}$      |              |                |
|-------------------|-----------------------------------|--------------|----------------|-----------------------------------|----------|------------|-----------------------------------|----------|----------------|-----------------------------------|----------|------------|-----------------------------------|--------------|----------------|
|                   | E<br>/kJ<br>mo<br>l <sup>-1</sup> | ln<br>A      | R <sup>2</sup> | E<br>/kJ<br>mo<br>l <sup>-1</sup> | ln<br>A  |            | E<br>/kJ<br>mo<br>l <sup>-1</sup> | ln<br>A  | R <sup>2</sup> | E<br>/kJ<br>mo<br>l <sup>-1</sup> | ln<br>A  |            | E<br>/kJ<br>mo<br>l <sup>-1</sup> | ln<br>A      | R <sup>2</sup> |
| F1                | 16<br>6.8                         | 33<br>.7     | 0.8<br>598     | 17<br>2.7                         | 34<br>.9 | 0.8<br>768 | 17<br>9.2                         | 36<br>.2 | 0.8<br>729     | 16<br>2.8                         | 32<br>.6 | 0.9<br>082 | 11<br>9.8                         | 22<br>.8     | 0.8<br>696     |
| F2                | 22<br>3.6                         | 46<br>.8     | 0.9<br>198     | 23<br>1.1                         | 48<br>.1 | 0.9<br>343 | 24<br>0.6                         | 49<br>.8 | 0.9<br>377     | 21<br>7.1                         | 44<br>.6 | 0.9<br>573 | 16<br>2.1                         | 32<br>.1     | 0.9<br>406     |
| F3                | 26<br>9.5                         | 57<br>.5     | 0.9<br>465     | 28<br>2.4                         | 59<br>.7 | 0.9<br>596 | 29<br>5.1                         | 61<br>.9 | 0.9<br>668     | 27<br>7.6                         | 57<br>.9 | 0.9<br>808 | 21<br>6.3                         | 43<br>.9     | 0.9<br>807     |
| D1                | 20<br>5.4                         | 41<br>.0     | 0.7<br>062     | 21<br>7.2                         | 43<br>.2 | 0.7<br>304 | 22<br>5.2                         | 44<br>.6 | 0.7<br>233     | 21<br>9.4                         | 43<br>.3 | 0.7<br>938 | 16<br>8.2                         | 31<br>.6     | 0.7<br>665     |
| D2                | 22<br>7.6                         | 45<br>.4     | 0.7<br>413     | 24<br>0.4                         | 47<br>.8 | 0.7<br>649 | 24<br>9.6                         | 49<br>.4 | 0.7<br>597     | 24<br>2.2                         | 47<br>.6 | 0.8<br>257 | 18<br>6.5                         | 34<br>.9     | 0.8<br>038     |
| D3                | 25<br>6.2                         | 50<br>.5     | 0.7<br>831     | 27<br>0.3                         | 53<br>.0 | 0.8<br>058 | 28<br>0.9                         | 54<br>.8 | 0.8<br>025     | 27<br>1.2                         | 52<br>.5 | 0.8<br>622 | 20<br>9.7                         | 38<br>.5     | 0.8<br>454     |
| D4                | 29<br>1.6                         | 58<br>.3     | 0.8<br>232     | 30<br>2.1                         | 59<br>.9 | 0.8<br>403 | 31<br>2.5                         | 61<br>.5 | 0.8<br>320     | 28<br>6.1                         | 55<br>.6 | 0.8<br>745 | 21<br>1.1                         | 38<br>.7     | 0.8<br>276     |
| A2                | 0.0                               | 0.<br>4      | 0.7<br>857     | 68.<br>6                          | 12<br>.0 | 0.8<br>114 | 71.<br>5                          | 12<br>.9 | 0.8<br>107     | 68.<br>4                          | 12<br>.3 | 0.8<br>708 | 51.<br>2                          | 8.<br>3      | 0.8<br>465     |
| A3                | 40.<br>1                          | 5.<br>1      | 0.7<br>582     | 42.<br>5                          | 6.<br>1  | 0.7<br>873 | 44.<br>5                          | 6.<br>8  | 0.7<br>872     | 42.<br>4                          | 6.<br>5  | 0.8<br>524 | 30.<br>8                          | 3.<br>8      | 0.8<br>165     |
| R1                | 98.<br>1                          | 17<br>.8     | 0.6<br>856     | 10<br>3.9                         | 19<br>.3 | 0.7<br>116 | 10<br>7.8                         | 20<br>.2 | 0.7<br>046     | 10<br>4.9                         | 19<br>.7 | 0.7<br>778 | 79.<br>1                          | 13<br>.8     | 0.7<br>428     |
| R2                | 11<br>6.4                         | 21<br>.5     | 0.7<br>489     | 12<br>3.1                         | 23<br>.1 | 0.7<br>736 | 12<br>7.9                         | 24<br>.1 | 0.7<br>696     | 12<br>3.6                         | 23<br>.2 | 0.8<br>349 | 94.<br>2                          | 16<br>.5     | 0.8<br>105     |
| R3                | 12<br>3.5                         | 22<br>.7     | 0.7<br>696     | 13<br>0.4                         | 24<br>.3 | 0.7<br>938 | 13<br>5.6                         | 25<br>.4 | 0.7<br>907     | 13<br>0.8                         | 24<br>.4 | 0.8<br>529 | 99.<br>9                          | 17<br>.3     | 0.8<br>315     |
| P2                | 44.<br>4                          | 5.<br>8      | 0.6<br>386     | 47.<br>2                          | 6.<br>9  | 0.6<br>685 | 49.<br>1                          | 7.<br>6  | 0.6<br>620     | 47.<br>6                          | 7.<br>4  | 0.7<br>407 | 34.<br>6                          | 4.<br>4      | 0.6<br>853     |
| P3                | 26.<br>5                          | 1.<br>6      | 0.5<br>828     | 28.<br>3                          | 2.<br>6  | 0.6<br>172 | 29.<br>5                          | 3.<br>1  | 0.6<br>117     | 28.<br>5                          | 3.<br>1  | 0.6<br>952 | 19.<br>8                          | 1.<br>0      | 0.6<br>107     |
| P4                | 17.<br>6                          | -<br>0.<br>7 | 0.5<br>171     | 18.<br>9                          | 0.<br>2  | 0.5<br>562 | 19.<br>7                          | 0.<br>8  | 0.5<br>523     | 19.<br>0                          | 0.<br>8  | 0.6<br>391 | 12.<br>3                          | -<br>0.<br>9 | 0.5<br>145     |
